# Supplementary material
Source: Springer Nature journal article supplement (https://www.springermedizin.de/resource/supplementary/13054_2011_586_MOESM3_ESM.pdf/9708796)
Supplement: MOESM3 [file 9708796]

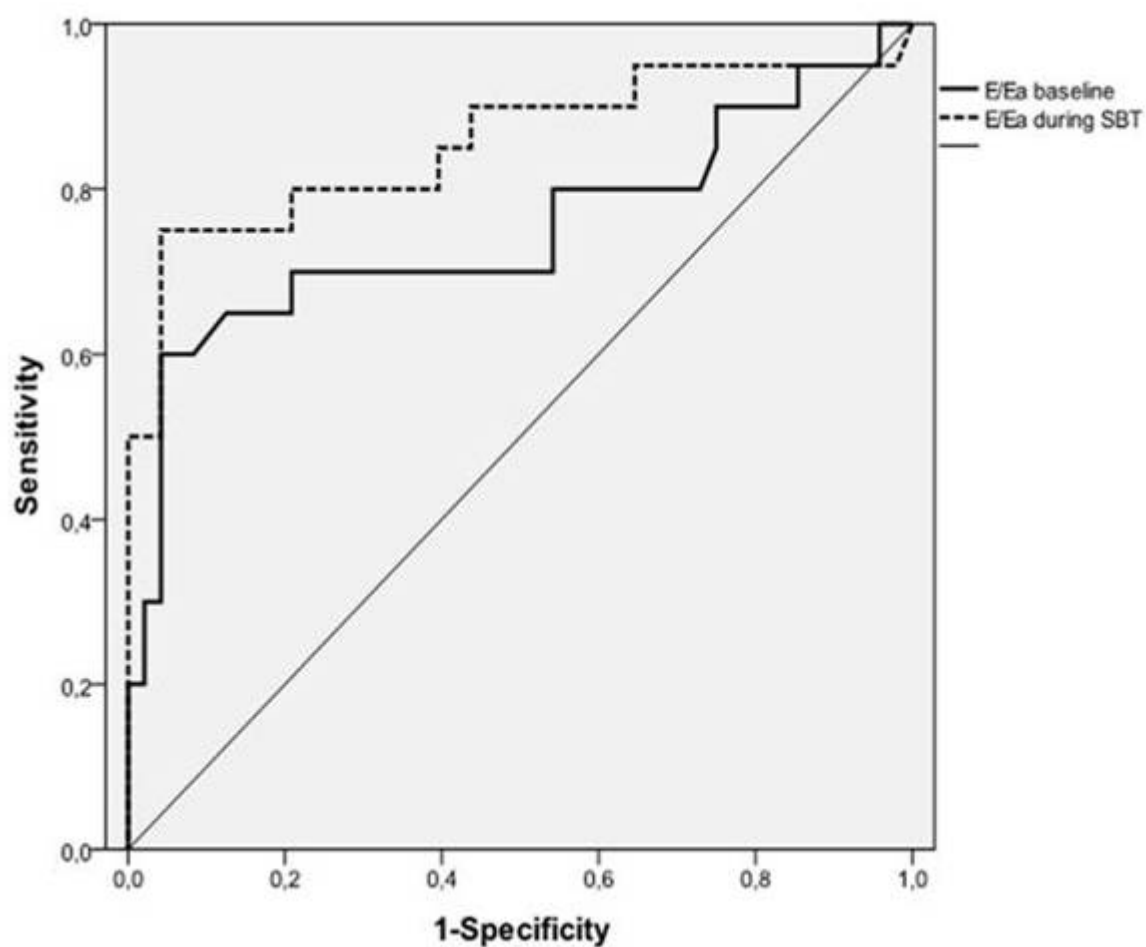

| Test          | AUC  | Standard Error | <i>p</i> |
|---------------|------|----------------|----------|
| E/Ea Baseline | 0.75 | 0.07           | 0.001    |
| E/Ea SBT      | 0.86 | 0.06           | <0.001   |
| R/VT Baseline | 0.77 | 0.05           | <0.001   |
| E Baseline    | 0.6  | 0.08           | 0.15     |
| DTE Baseline  | 0.67 | 0.07           | 0.03     |
| Ea Baseline   | 0.69 | 0.07           | 0.01     |
